# Supplementary material for: High species diversity of trichostrongyle parasite communities within and between Western Canadian commercial and conservation bison herds revealed by nemabiome metabarcoding
Source: Springer Nature journal article supplement (doi:10.1186/s13071-018-2880-y), 2018-05-15

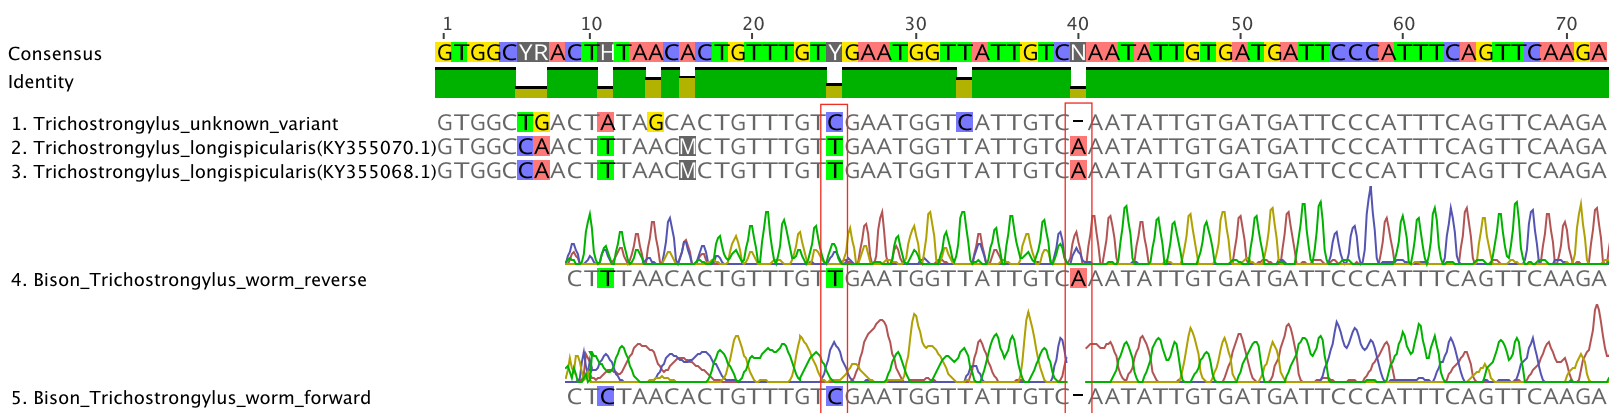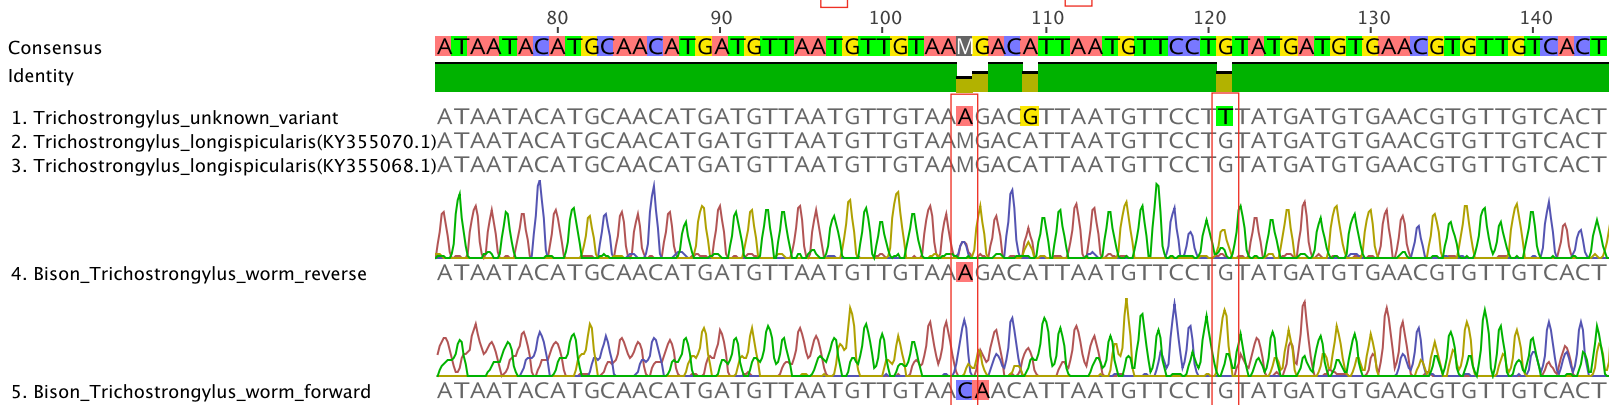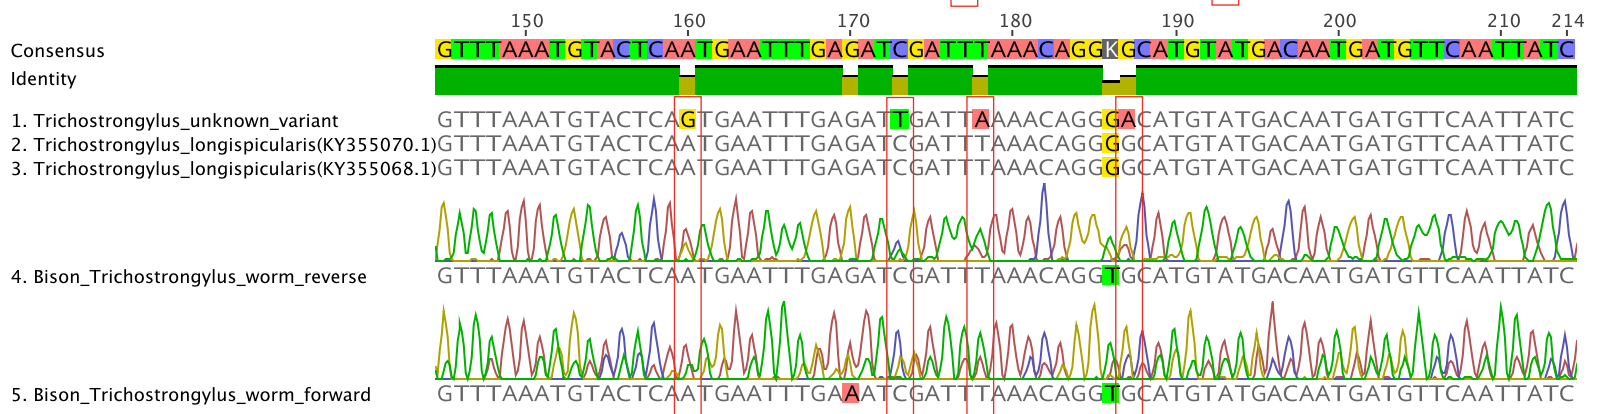

Supplement: MOESM6 [file 13071_2018_2880_MOESM6_ESM.pdf › Buffalo Field Campaign sources FWS-R6-ES-2022-0028/Avramenko et al_Additional data (2018)/13071_2018_2880_MOESM6_ESM.pdf]
